# Supplementary material
Source: publisher site journal article supplement (https://www.dovepress.com/article/299975)
Supplement: Supplementary file 1 [file get_supplementary_file.php]

- Other explanatory covariates

In this study, patient demographics [age, residency], patient characteristics [socioeconomic status, comorbidity, body mass index (BMI), smoking, drinking], disease characteristics [laterality, tumor size, histology, pathological T-stage & N-stage, grade, lymph node dissection (LND) extent], treatment characteristics [surgery, RT volume, RT prolongation, RT boost, neoadjuvant systemic treatment (ST), and adjuvant ST], and prognostic factors [estrogen receptor (ER), progesterone receptor (PR) , human epidermal growth factor receptor 2 (Her2)] were included and defined as follows. Patient residency region was classified as northern Taiwan or elsewhere. Socioeconomic status was classified as higher [income greater than minimum wage] or not. Comorbidity was classified as with or without via Carlson comorbidity score. The smoking, drinking, ER, PR, Her2, RT boost, neoadjuvant ST, and adjuvant ST were classified as yes or no. Laterality was classified as left or right. Histology was classified as infiltrating ductal carcinoma (IDC) or others. Pathological T-stage was classified as 1-2 vs 3-4. Pathological N-stage was classified as 0-1 vs 2-3. Grade was classified as low (grade 1-2) or high. The surgery type was classified as BCS or mastectomy. RT volume was classified as with vs without nodal RT. RT prolongation was defined as more than one week’s prolongation or not.

- Tables used in supplementary analyses

Table S1. SA-1: Patient characteristics of the PS-matched subgroup

|  |  | IGRT  (n=1013) |  | non-IGRT  (n=1013) |  |  |
| --- | --- | --- | --- | --- | --- | --- |
|  |  | Number or  mean (sd)a | (%)a | Number or  mean (sd)a | (%)a | Standardized differencea |
| Age (year) |  | 50.17 (9.11) |  | 50.17 (9.34) |  | 0 |
| Residency | Non-north | 762 | 75 | 767 | 76 | 0.011 |
|  | North | 251 | 25 | 246 | 24 |  |
| Social economic status | No more than minimum wage | 215 | 21 | 210 | 21 | 0.012 |
|  | Higher | 798 | 79 | 803 | 79 |  |
| Comorbidity | Without | 730 | 72 | 731 | 72 | 0.002 |
|  | Withb | 283 | 28 | 282 | 28 |  |
| BMI |  | 24.19 (4.10) |  | 24.30 (4.24) |  | 0.027 |
| Smoking | No | 964 | 95 | 959 | 95 | 0.022 |
|  | Yes | 49 | 5 | 54 | 5 |  |
| Drinking  Smoking | No | 979 | 97 | 984 | 97 | 0.028 |
|  | Yes | 34 | 3 | 29 | 3 |  |
| Laterality | left | 508 | 50 | 517 | 51 | 0.018 |
|  | right | 505 | 50 | 496 | 49 |  |
| Tumor size (mm) |  | 24.20 (16.66) |  | 24.27 (16.37) |  | 0.004 |
| Histology | IDC | 886 | 87 | 881 | 87 | 0.015 |
|  | others | 127 | 13 | 132 | 13 |  |
| pT | 1-2 | 951 | 94 | 949 | 94 | 0.008 |
|  | 3-4 | 62 | 6 | 64 | 6 |  |
| pN | 0-1 | 816 | 81 | 800 | 79 | 0.039 |
|  | 2-3 | 197 | 19 | 213 | 21 |  |
| Grade | low | 701 | 69 | 688 | 68 | 0.028 |
|  | high | 312 | 31 | 325 | 32 |  |
| ER | No | 184 | 18 | 188 | 19 | 0.01 |
|  | Yes | 829 | 82 | 825 | 81 |  |
| PR | No | 268 | 26 | 265 | 26 | 0.007 |
|  | Yes | 745 | 74 | 748 | 74 |  |
| Her2 | No | 767 | 76 | 765 | 76 | 0.005 |
|  | Yes | 246 | 24 | 248 | 24 |  |
| Surgery | Mastectomy | 280 | 28 | 295 | 29 | 0.033 |
|  | BCS | 733 | 72 | 718 | 71 |  |
| LND extent (number) |  | 10.82 (9.21) |  | 11.26 (9.90) |  | 0.047 |
| RT volume | without | 499 | 49 | 495 | 49 | 0.008 |
|  | With nodal RT | 514 | 51 | 518 | 51 |  |
| RT prolongation | ≤ 1 week | 943 | 93 | 942 | 93 | 0.004 |
|  | > 1 week | 70 | 7 | 71 | 7 |  |
| RT boost | No | 274 | 27 | 283 | 28 | 0.02 |
|  | Yes | 739 | 73 | 730 | 72 |  |
| Neoadjuvant ST | No | 907 | 90 | 913 | 90 | 0.02 |
|  | Yes | 106 | 10 | 100 | 10 |  |
| Adjuvant ST | No | 21 | 2 | 22 | 2 | 0.007 |
|  | Yes | 992 | 98 | 991 | 98 |  |

BCS, breast-conserving surgery; BMI, body mass index; ER, estrogen receptor; IDC, infiltrating ductal carcinoma; Her2, human epidermal growth factor receptor 2; IGRT, image-guided radiotherapy; LND, lymph node dissection; PSW, propensity-score weighting; PR, progesterone receptor; RT, radiotherapy; SA, supplementary analysis; sd, standard deviation; ST, systemic treatment.

a rounded.

b modified Carlson comorbidity score ≥1.

Table S2. SA-2: Patient characteristics of those received BCS & breast RT

|  |  | IGRT  (n=466) |  | non-IGRT  (n=466) |  |  |
| --- | --- | --- | --- | --- | --- | --- |
|  |  | Number or  mean (sd)a | (%)a | Number or  mean (sd)a | (%)a | Standardized differencea |
| Age (year) |  | 49.94 (9.31) |  | 50.53 (9.35) |  | 0.063 |
| Residency | Non-north | 341 | 73 | 369 | 79 | 0.141 |
|  | North | 125 | 27 | 97 | 21 |  |
| Social economic status | No more than minimum wage | 96 | 21 | 94 | 20 | 0.011 |
|  | Higher | 370 | 79 | 372 | 80 |  |
| Comorbidity | Without | 337 | 72 | 328 | 70 | 0.043 |
|  | Withb | 129 | 28 | 138 | 30 |  |
| BMI |  | 24.00 (3.96) |  | 23.88 (4.13) |  | 0.029 |
| Smoking | No | 438 | 94 | 433 | 93 | 0.043 |
|  | Yes | 28 | 6 | 33 | 7 |  |
| Drinking  Smoking | No | 447 | 96 | 446 | 96 | 0.011 |
|  | Yes | 19 | 4 | 20 | 4 |  |
| Laterality | left | 233 | 50 | 254 | 55 | 0.09 |
|  | right | 233 | 50 | 212 | 45 |  |
| Tumor size (mm) |  | 17.32 (8.32) |  | 17.41 (8.52) |  | 0.011 |
| Histology | IDC | 403 | 86 | 404 | 87 | 0.006 |
|  | others | 63 | 14 | 62 | 13 |  |
| pT | 1-2 | c | c | c | c | c |
|  | 3-4 | c | c | c | c |  |
| pN | 0-1 | 463 | 99 | 463 | 99 | 0 |
|  | 2-3 | 3 | 1 | 3 | 1 |  |
| Grade | 1-2 | 343 | 74 | 350 | 75 | 0.034 |
|  | 3-4 | 123 | 26 | 116 | 25 |  |
| ER | No | 74 | 16 | 83 | 18 | 0.052 |
|  | Yes | 392 | 84 | 383 | 82 |  |
| PR | No | 103 | 22 | 103 | 22 | 0 |
|  | Yes | 363 | 78 | 363 | 78 |  |
| Her2 | No | 376 | 81 | 383 | 82 | 0.039 |
|  | Yes | 90 | 19 | 83 | 18 |  |
| LND extent (number) |  | 6.23 (6.97) |  | 6.89 (7.88) |  | 0.089 |
| RT prolongation | ≤ 1 week | 450 | 97 | 451 | 97 | 0.012 |
|  | > 1 week | 16 | 3 | 15 | 3 |  |
| RT boost | No | 106 | 23 | 78 | 17 | 0.151 |
|  | Yes | 360 | 77 | 388 | 83 |  |
| Neoadjuvant ST | No | 450 | 97 | 445 | 95 | 0.055 |
|  | Yes | 16 | 3 | 21 | 5 |  |
| Adjuvant ST | No | 10 | 2 | 12 | 3 | 0.028 |
|  | Yes | 456 | 98 | 454 | 97 |  |

BCS, breast-conserving surgery; BMI, body mass index; ER, estrogen receptor; IDC, infiltrating ductal carcinoma; Her2, human epidermal growth factor receptor 2; IGRT, image-guided radiotherapy; LND, lymph node dissection; PSW, propensity-score weighting; PR, progesterone receptor; RT, radiotherapy; SA, supplementary analysis; sd, standard deviation; ST, systemic treatment.

a rounded.

b modified Carlson comorbidity score ≥1.

c the exact numbers were not reported because of a Health and Welfare Data Science Center (HWDC) database center policy to avoid numbers in single cells (≤ 2).

Table S3. SA-3: Patient characteristics of those received BCS & breast plus nodal RT

|  |  | IGRT  (n=266) |  | non-IGRT  (n=266) |  |  |
| --- | --- | --- | --- | --- | --- | --- |
|  |  | Number or  mean (sd)a | (%)a | Number or  mean (sd)a | (%)a | Standardized differencea |
| Age (year) |  | 50.35 (8.73) |  | 50.52 (8.99) |  | 0.018 |
| Residency | Non-north | 231 | 87 | 231 | 87 | 0 |
|  | North | 35 | 13 | 35 | 13 |  |
| Social economic status | No more than minimum wage | 54 | 20 | 60 | 23 | 0.055 |
|  | Higher | 212 | 80 | 206 | 77 |  |
| Comorbidity | Without | 190 | 71 | 189 | 71 | 0.008 |
|  | Withb | 76 | 29 | 77 | 29 |  |
| BMI |  | 24.57 (4.36) |  | 24.64 (3.92) |  | 0.016 |
| Smoking | No | 256 | 96 | 259 | 97 | 0.064 |
|  | Yes | 10 | 4 | 7 | 3 |  |
| Drinking  Smoking | No | 257 | 97 | 260 | 98 | 0.068 |
|  | Yes | 9 | 3 | 6 | 2 |  |
| Laterality | left | 134 | 50 | 133 | 50 | 0.008 |
|  | right | 132 | 50 | 133 | 50 |  |
| Tumor size (mm) |  | 21.91 (10.59) |  | 21.85 (11.85) |  | 0.006 |
| Histology | IDC | 235 | 88 | 229 | 86 | 0.068 |
|  | others | 31 | 12 | 37 | 14 |  |
| pT | 1-2 | 261 | 98 | 258 | 97 | 0.073 |
|  | 3-4 | 5 | 2 | 8 | 3 |  |
| pN | 0-1 | 217 | 82 | 218 | 82 | 0.01 |
|  | 2-3 | 49 | 18 | 48 | 18 |  |
| Grade | 1-2 | 179 | 67 | 193 | 73 | 0.115 |
|  | 3-4 | 87 | 33 | 73 | 27 |  |
| ER | No | 47 | 18 | 48 | 18 | 0.01 |
|  | Yes | 219 | 82 | 218 | 82 |  |
| PR | No | 74 | 28 | 62 | 23 | 0.104 |
|  | Yes | 192 | 72 | 204 | 77 |  |
| Her2 | No | 208 | 78 | 212 | 80 | 0.037 |
|  | Yes | 58 | 22 | 54 | 20 |  |
| LND extent (number) |  | 11.71 (8.58) |  | 11.96 (8.56) |  | 0.029 |
| RT prolongation | ≤ 1 week | 239 | 90 | 242 | 91 | 0.038 |
|  | > 1 week | 27 | 10 | 24 | 9 |  |
| RT boost | No | 22 | 8 | 23 | 9 | 0.014 |
|  | Yes | 244 | 92 | 243 | 91 |  |
| Neoadjuvant ST | No | 238 | 89 | 244 | 92 | 0.077 |
|  | Yes | 28 | 11 | 22 | 8 |  |
| Adjuvant ST | No | 5 | 2 | 5 | 2 | 0 |
|  | Yes | 261 | 98 | 261 | 98 |  |

BCS, breast-conserving surgery; BMI, body mass index; ER, estrogen receptor; IDC, infiltrating ductal carcinoma; Her2, human epidermal growth factor receptor 2; IGRT, image-guided radiotherapy; LND, lymph node dissection; PSW, propensity-score weighting; PR, progesterone receptor; RT, radiotherapy; SA, supplementary analysis; sd, standard deviation; ST, systemic treatment.

a rounded.

b modified Carlson comorbidity score ≥1.

Table S4. SA-4: Patient characteristics of those received mastectomy & chest wall plus nodal RT

|  |  | IGRT  (n=247) |  | non-IGRT  (n=247) |  |  |
| --- | --- | --- | --- | --- | --- | --- |
|  |  | Number or  mean (sd)a | (%)a | Number or  mean (sd)a | (%)a | Standardized differencea |
| Age (year) |  | 50.37 (8.95) |  | 50.89 (8.76) |  | 0.059 |
| Residency | Non-north | 167 | 68 | 170 | 69 | 0.026 |
|  | North | 80 | 32 | 77 | 31 |  |
| Social economic status | No more than minimum wage | 55 | 22 | 52 | 21 | 0.029 |
|  | Higher | 192 | 78 | 195 | 79 |  |
| Comorbidity | Without | 181 | 73 | 176 | 71 | 0.045 |
|  | Withb | 66 | 27 | 71 | 29 |  |
| BMI |  | 24.10 (4.16) |  | 24.21 (4.15) |  | 0.026 |
| Smoking | No | 236 | 96 | 237 | 96 | 0.02 |
|  | Yes | 11 | 4 | 10 | 4 |  |
| Drinking  Smoking | No | 242 | 98 | 242 | 98 | 0 |
|  | Yes | 5 | 2 | 5 | 2 |  |
| Laterality | left | 124 | 50 | 113 | 46 | 0.089 |
|  | right | 123 | 50 | 134 | 54 |  |
| Tumor size (mm) |  | 38.26 (22.98) |  | 37.45 (25.25) |  | 0.034 |
| Histology | IDC | 217 | 88 | 208 | 84 | 0.105 |
|  | others | 30 | 12 | 39 | 16 |  |
| pT | 1-2 | 194 | 79 | 196 | 79 | 0.02 |
|  | 3-4 | 53 | 21 | 51 | 21 |  |
| pN | 0-1 | 114 | 46 | 118 | 48 | 0.032 |
|  | 2-3 | 133 | 54 | 129 | 52 |  |
| Grade | 1-2 | 157 | 64 | 174 | 70 | 0.147 |
|  | 3-4 | 90 | 36 | 73 | 30 |  |
| ER | No | 51 | 21 | 46 | 19 | 0.051 |
|  | Yes | 196 | 79 | 201 | 81 |  |
| PR | No | 76 | 31 | 65 | 26 | 0.099 |
|  | Yes | 171 | 69 | 182 | 74 |  |
| Her2 | No | 164 | 66 | 171 | 69 | 0.061 |
|  | Yes | 83 | 34 | 76 | 31 |  |
| LND extent (number) |  | 17.50 (8.80) |  | 17.35 (7.86) |  | 0.017 |
| RT prolongation | ≤ 1 week | 226 | 91 | 231 | 94 | 0.077 |
|  | > 1 week | 21 | 9 | 16 | 6 |  |
| RT boost | No | 124 | 50 | 123 | 50 | 0.008 |
|  | Yes | 123 | 50 | 124 | 50 |  |
| Neoadjuvant ST | No | 192 | 78 | 202 | 82 | 0.101 |
|  | Yes | 55 | 22 | 45 | 18 |  |
| Adjuvant ST | No | 3 | 1 | 3 | 1 | 0 |
|  | Yes | 244 | 99 | 244 | 99 |  |

BMI, body mass index; ER, estrogen receptor; IDC, infiltrating ductal carcinoma; Her2, human epidermal growth factor receptor 2; IGRT, image-guided radiotherapy; LND, lymph node dissection; PSW, propensity-score weighting; PR, progesterone receptor; RT, radiotherapy; SA, supplementary analysis; sd, standard deviation; ST, systemic treatment.

a rounded.

b modified Carlson comorbidity score ≥1.

Table S5. SA-5: Patient characteristics of the study population in the primary analysis but using alternative covariate classification for T-stage and N-stage

|  |  | IGRT  (n=1013) |  | non-IGRT  (n=5477) |  | Standardized differencea  (rounded)* | |
| --- | --- | --- | --- | --- | --- | --- | --- |
|  |  | Number or  mean (sd)a | (%)a | Number or  mean (sd)a | (%)a | Before  PSW | After  PSW |
| Age (year) |  | 50.17 (9.11) |  | 50.77 (9.35) |  | 0.065 | ≈ 0 |
| Residency | Non-north | 762 | 75 | 2485 | 45 | 0.641 | ≈ 0 |
|  | North | 251 | 25 | 2992 | 55 |  |  |
| Social economic status | No more than minimum wage | 215 | 21 | 1224 | 22 | 0.027 | ≈ 0 |
|  | Higher | 798 | 79 | 4253 | 78 |  |  |
| Comorbidity | Without | 730 | 72 | 3940 | 72 | 0.003 | ≈ 0 |
|  | Withb | 283 | 28 | 1537 | 28 |  |  |
| BMI |  | 24.19 (4.10) |  | 24.41 (4.24) |  | 0.052 | 0 |
| Smoking | No | 964 | 95 | 5195 | 95 | 0.014 | ≈ 0 |
|  | Yes | 49 | 5 | 282 | 5 |  |  |
| Drinking  Smoking | No | 979 | 97 | 5091 | 93 | 0.167 | ≈ 0 |
|  | Yes | 34 | 3 | 386 | 7 |  |  |
| Laterality | left | 508 | 50 | 2804 | 51 | 0.021 | 0 |
|  | right | 505 | 50 | 2673 | 49 |  |  |
| Tumor size (mm) |  | 24.20 (16.66) |  | 24.32 (16.95) |  | 0.007 | 0 |
| Histology | IDC | 886 | 87 | 4763 | 87 | 0.015 | 0 |
|  | others | 127 | 13 | 714 | 13 |  |  |
| pT | 1 | 536 | 53 | 2943 | 53 | 0.016 | 0 |
|  | 2 | 415 | 41 | 2235 | 41 | 0.003 | 0 |
|  | 3 | 53 | 5 | 252 | 5 | 0.029 | 0 |
|  | 4 | 9 | 1 | 47 | 1 | 0.003 | 0 |
| pN | 0 | 534 | 53 | 2829 | 52 | 0.021 | 0 |
|  | 1 | 282 | 28 | 1500 | 27 | 0.010 | ≈ 0 |
|  | 2 | 126 | 12 | 716 | 13 | 0.019 | ≈ 0 |
|  | 3 | 71 | 7 | 432 | 8 | 0.033 | ≈ 0 |
| Grade | low | 701 | 69 | 3675 | 67 | 0.045 | ≈ 0 |
|  | high | 312 | 31 | 1802 | 33 |  |  |
| ER | No | 184 | 18 | 1051 | 19 | 0.026 | 0 |
|  | Yes | 829 | 82 | 4426 | 81 |  |  |
| PR | No | 268 | 26 | 1463 | 27 | 0.006 | 0 |
|  | Yes | 745 | 74 | 4014 | 73 |  |  |
| Her2 | No | 767 | 76 | 4159 | 76 | 0.005 | 0 |
|  | Yes | 246 | 24 | 1318 | 24 |  |  |
| Surgery | Mastectomy | 280 | 28 | 1751 | 32 | 0.095 | 0 |
|  | BCS | 733 | 72 | 3726 | 68 |  |  |
| LND extent (number) |  | 10.82 (9.21) |  | 12.34 (10.43) |  | 0.155 | ≈ 0 |
| RT volume | Without | 499 | 49 | 2659 | 49 | 0.014 | ≈ 0 |
|  | With nodal RT | 514 | 51 | 2818 | 51 |  |  |
| RT prolongation | ≤ 1 week | 943 | 93 | 5224 | 95 | 0.098 | 0 |
|  | > 1 week | 70 | 7 | 253 | 5 |  |  |
| RT boost | No | 274 | 27 | 1393 | 25 | 0.037 | ≈ 0 |
|  | Yes | 739 | 73 | 4084 | 75 |  |  |
| Neoadjuvant ST | No | 907 | 90 | 4866 | 89 | 0.022 | ≈ 0 |
|  | Yes | 106 | 10 | 611 | 11 |  |  |
| Adjuvant ST | No | 21 | 2 | 129 | 2 | 0.019 | 0 |
|  | Yes | 992 | 98 | 5348 | 98 |  |  |

BCS, breast-conserving surgery; BMI, body mass index; ER, estrogen receptor; IDC, infiltrating ductal carcinoma; Her2, human epidermal growth factor receptor 2; IGRT, image-guided radiotherapy; LND, lymph node dissection; PSW, propensity-score weighting; PR, progesterone receptor; RT, radiotherapy; sd, standard deviation; ST, systemic treatment.

a rounded; b modified Carlson comorbidity score ≥1.
